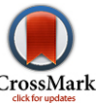

## Correction

# Correction: Improving the Efficiency of Abdominal Aortic Aneurysm Wall Stress Computations

**The PLOS ONE Staff**

There is an error in Equation 33. Please view the complete, correct equation here:

$$\frac{\left(\int_0^1 |\sigma_i - \sigma_i^*| dr'\right)}{\int_0^1 |\sigma_i^*| dr'}$$

**Reference**

1. Zelaya JE, Goenezen S, Dargon PT, Azarbal A-F, Rugonyi S (2014) Improving the Efficiency of Abdominal Aortic Aneurysm Wall Stress Computations. PLoS ONE 9(7): e101353. doi:10.1371/journal.pone.0101353

---

**Citation:** The PLOS ONE Staff (2014) Correction: Improving the Efficiency of Abdominal Aortic Aneurysm Wall Stress Computations. PLoS ONE 9(10): e111567. doi:10.1371/journal.pone.0111567

**Published:** October 15, 2014

**Copyright:** © 2014 The PLOS ONE Staff. This is an open-access article distributed under the terms of the Creative Commons Attribution License, which permits unrestricted use, distribution, and reproduction in any medium, provided the original author and source are credited.
